# Supplementary material for: Identification of Subgroups within a Japanese Older Adult Population for whom Statin Therapy is Effective in Reducing Mortality
Source: Preprints.org preprint supplement (doi:10.20944/preprints202306.0930.v1), 2023-06-13
Supplement: Supplementary file 1 [file supplementary]

**Supplementary Table 1.** Variable definition by ICD-10 codes in this study.

| Covariates                            | ICD-10 Codes                                                                                                                                                                                                                                                                                                                                                                                                                                                  |
|---------------------------------------|---------------------------------------------------------------------------------------------------------------------------------------------------------------------------------------------------------------------------------------------------------------------------------------------------------------------------------------------------------------------------------------------------------------------------------------------------------------|
| Any malignancy                        | C00, C01, C02, C03, C04, C05, C06, C07, C08, C09, C10, C11, C12, C13, C14, C15, C16, C17, C18, C19, C20, C21, C22, C23, C24, C25, C26, C30, C31, C32, C33, C34, C37, C38, C39, C40, C41, C43, C45, C46, C47, C48, C49, C50, C51, C52, C53, C54, C55, C56, C57, C58, C60, C61, C62, C63, C64, C65, C66, C67, C68, C69, C70, C71, C72, C73, C74, C75, C76, C77, C78, C79, C80, C81, C82, C83, C84, C85, C88, C90, C91, C92, C93, C94, C95, C96, C97, C900, C902 |
| Liver disease / cirrhosis             | B18, I850, I859, I864, I982, K700, K701, K702, K703, K704, K709, K711, K713, K714, K715, K717, K72, K73, K74, K760, K762, K763, K764, K765, K766, K767, K768, K769, Z944                                                                                                                                                                                                                                                                                      |
| Diabetes mellitus                     | E100, E101, E102, E103, E104, E105, E106, E107, E108, E109, E110, E111, E112, E113, E114, E115, E116, E117, E118, E119, E120, E121, E122, E123, E124, E125, E126, E127, E128, E129, E130, E131, E132, E133, E134, E135, E136, E137, E138, E139, E140, E141, E142, E143, E144, E145, E146, E147, E148, E149                                                                                                                                                    |
| Renal disease / failure               | I120, I131, N18, N19, N032, N033, N034, N035, N036, N037, N052, N053, N054, N055, N056, N057, N18, N19, N250, Z490, Z491, Z492, Z940, Z992                                                                                                                                                                                                                                                                                                                    |
| Rheumatic disease                     | L940, L941, L943, M05, M06, M08, M120, M123, M30, M310, M311, M312, M313, M315, M32, M33, M34, M35, M45, M461, M468, M469, M360                                                                                                                                                                                                                                                                                                                               |
| Hypertension                          | I10, I11, I12, I13, I15                                                                                                                                                                                                                                                                                                                                                                                                                                       |
| Deficiency anemia/Blood loss anemia   | D500, D508, D509, D51, D52, D53                                                                                                                                                                                                                                                                                                                                                                                                                               |
| Alcohol abuse                         | F10, E52, G621, I426, K292, K700, K703, K709, T51, Z502, Z714, Z721                                                                                                                                                                                                                                                                                                                                                                                           |
| Peptic ulcer disease                  | K25, K26, K27, K28                                                                                                                                                                                                                                                                                                                                                                                                                                            |
| Dementia                              | F00, F01, F02, F03, F051, G30, G311                                                                                                                                                                                                                                                                                                                                                                                                                           |
| Hemiplegia / paraplegia               | G041, G114, G801, G802, G81, G82, G830, G831, G832, G833, G834, G839                                                                                                                                                                                                                                                                                                                                                                                          |
| Depression                            | F204, F313, F314, F315, F32, F33, F341, F412, F432                                                                                                                                                                                                                                                                                                                                                                                                            |
| Fatigue                               | R53                                                                                                                                                                                                                                                                                                                                                                                                                                                           |
| Gait Abnormality / difficulty walking | R260, R261, R262, R268                                                                                                                                                                                                                                                                                                                                                                                                                                        |
| Hyperlipidemia                        | E780, E781, E782, E783, E784, E785                                                                                                                                                                                                                                                                                                                                                                                                                            |

|             |                    |
|-------------|--------------------|
| Sleep Apnea | G473               |
| COPD        | J41, J42, J43, J44 |

\*Any malignancy including lymphoma and leukemia, and malignant neoplasm of skin.

COPD: chronic obstructive pulmonary disease, ICD-10: International Statistical Classification of Diseases and Related Health Problems, Tenth Revision.

**Supplementary Table 2.** Association between statin use, all-cause mortality, after adjustment by the inverse probability of treatment-weighted (IPTW) method.

| Variable           | Category          | Number of<br>cases after<br>adjustment | Number<br>of statin<br>group | Cox regression analysis in adjusted<br>population |        |         |        | RR   | RD   | RD 95% CI | NNT  | NNT 95% CI |       |        |
|--------------------|-------------------|----------------------------------------|------------------------------|---------------------------------------------------|--------|---------|--------|------|------|-----------|------|------------|-------|--------|
|                    |                   |                                        |                              | HR                                                | 95% CI | p-value |        |      |      |           |      |            |       |        |
|                    |                   |                                        |                              |                                                   |        |         |        |      |      |           |      |            |       |        |
| Overall population | -                 | 34,219                                 | 2,753                        | 0.40                                              | 0.33   | 0.48    | <.0001 | 0.31 | 0.05 | 0.04      | 0.06 | 21.20      | 18.10 | 24.70  |
| Age                | 65 to <75 years   | 21,479                                 | 2,062                        | 0.30                                              | 0.20   | 0.44    | <.0001 | 0.22 | 0.02 | 0.02      | 0.03 | 44.64      | 39.18 | 54.57  |
|                    | 75 to <85 years   | 10,284                                 | 613                          | 0.42                                              | 0.31   | 0.57    | <.0001 | 0.37 | 0.07 | 0.04      | 0.09 | 14.78      | 11.75 | 22.39  |
|                    | ≥85 years         | 3,011                                  | 75                           | 0.59                                              | 0.37   | 0.93    | 0.02   | 0.55 | 0.13 | -0.004    | 0.28 | 7.63       | 3.63  | -244.3 |
| Sex                | Men               | 17,643                                 | 1,027                        | 0.35                                              | 0.26   | 0.48    | <.0001 | 0.25 | 0.06 | 0.05      | 0.07 | 15.68      | 13.45 | 19.21  |
|                    | Women             | 17,939                                 | 1,804                        | 0.43                                              | 0.33   | 0.55    | <.0001 | 0.33 | 0.04 | 0.03      | 0.04 | 27.50      | 23.30 | 38.87  |
| Current smoker     | Yes               | 3,763                                  | 226                          | 0.43                                              | 0.33   | 0.97    | 0.03   | 0.51 | 0.04 | 0.002     | 0.08 | 22.29      | 11.69 | 433.8  |
|                    | No                | 30,474                                 | 2,535                        | 0.38                                              | 0.31   | 0.47    | <.0001 | 0.29 | 0.05 | 0.04      | 0.05 | 20.95      | 18.34 | 24.42  |
| BMI                | <18.5             | 2,847                                  | 133                          | 0.23                                              | 0.10   | 0.55    | 0.0008 | 0.27 | 0.08 | 0.04      | 0.11 | 12.02      | 8.97  | 25.33  |
|                    | 18.5 to <25.0     | 21,879                                 | 1,871                        | 0.43                                              | 0.34   | 0.54    | <.0001 | 0.30 | 0.05 | 0.04      | 0.05 | 21.13      | 18.61 | 26.01  |
|                    | 25.0 to <30.0     | 8,163                                  | 720                          | 0.37                                              | 0.24   | 0.56    | <.0001 | 0.23 | 0.05 | 0.04      | 0.06 | 21.20      | 18.15 | 27.87  |
|                    | ≥30.0             | 798                                    | 71                           | 0.64                                              | 0.22   | 1.83    | 0.41   | 0.77 | 0.01 | -0.04     | 0.07 | 73.34      | 13.55 | -22.85 |
| LDL cholesterol    | <120 mg/dl        | 27,956                                 | 436                          | 0.57                                              | 0.37   | 0.86    | 0.008  | 0.20 | 0.05 | 0.04      | 0.07 | 20.34      | 14.62 | 23.46  |
|                    | 120 to <140 mg/dl | 20,129                                 | 891                          | 0.64                                              | 0.46   | 0.90    | 0.009  | 0.46 | 0.02 | -0.02     | 0.05 | 43.70      | 20.90 | -49.61 |
|                    | 140 to ≤160 mg/dl | 8,781                                  | 1,132                        | 0.47                                              | 0.34   | 0.66    | <.0001 | 0.53 | 0.02 | 0.01      | 0.03 | 45.42      | 31.91 | 75.48  |
|                    | >160 mg/dl        | 7,223                                  | 2,134                        | 0.51                                              | 0.39   | 0.67    | <.0001 | 0.36 | 0.03 | 0.02      | 0.04 | 34.19      | 25.29 | 51.32  |
| Diabetes           | Yes               | 2,223                                  | 239                          | 0.31                                              | 0.16   | 0.58    | 0.0002 | 0.25 | 0.08 | 0.05      | 0.10 | 12.78      | 9.66  | 20.96  |
|                    | No                | 31,225                                 | 2,516                        | 0.41                                              | 0.34   | 0.50    | <.0001 | 0.32 | 0.05 | 0.04      | 0.05 | 22.14      | 18.85 | 26.45  |
| Rheumatic disease  | Yes               | 1,350                                  | 118                          | 0.40                                              | 0.17   | 0.97    | 0.04   | 0.11 | 0.07 | 0.04      | 0.08 | 14.75      | 12.11 | 24.07  |

|          |     |        |       |      |      |      |        |      |      |      |      |       |       |       |
|----------|-----|--------|-------|------|------|------|--------|------|------|------|------|-------|-------|-------|
|          | No  | 32,059 | 2,617 | 0.40 | 0.33 | 0.49 | <.0001 | 0.32 | 0.05 | 0.04 | 0.06 | 21.11 | 18.00 | 24.98 |
| Dementia | Yes | 861    | 60    | 0.35 | 0.19 | 0.67 | 0.0015 | 0.42 | 0.18 | 0.05 | 0.26 | 5.69  | 3.83  | 18.81 |
|          | No  | 32,672 | 2,654 | 0.39 | 0.32 | 0.48 | <.0001 | 0.30 | 0.04 | 0.04 | 0.05 | 22.52 | 19.58 | 26.56 |

CI: confidence interval, HR: hazard ratio, NNT: number needed to treat, RD: risk difference, RR: risk ratio.
